# Supplementary material for: UTransBPNet for Cuffless and Calibration-free Blood Pressure Estimation under Dynamic Conditions
Source: Research Square preprint supplement (doi:10.21203/rs.3.rs-5570097/v1), 2025-04-09
Supplement: Supplementary file 1 [file 5239a065dbcb55b74defc58d.docx]

*UTransBPNet* for Cuffless and Calibration-free Blood Pressure Estimation under Dynamic Conditions

Yali Zheng1*, Hongda Huang1, Jiasheng Gao1, Jingyuan Hong2, Shenghao Wu1,

Yuanting Zhang3, *IEEE Fellow,* Qing Liu4*

1 Yali Zheng, Hongda Huang, Jiasheng Gao and Shenghao Wu are with the Department of Biomedical Engineering, College of Health Science and Environmental Engineering, at Shenzhen Technology University, Shenzhen, China.

2 Jingyuan Hong is with the Department of Biomedical Engineering, at King's College London, London, UK.

3 Yuanting Zhang is with the Chinese University of Hong Kong, Hong Kong, China.

4 Qing Liu is with the Department of Communication and Networking, at Xi’an Jiaotong-Liverpool University, Suzhou, China.

*Corresponding authors: Qing Liu, [Qing.Liu@xjtlu.edu.cn](mailto:Qing.Liu@xjtlu.edu.cn); Yali Zheng, [zhengyali@sztu.edu.cn](mailto:zhengyali@sztu.edu.cn) .

**Supplementary Table.S1** Three fine-tuning schemes to estimate SBP and DBP

| **DeepTune, FinalTune and AllTune Schemes** |
| --- |
| **Data：**Training set（ ）, is the continuous BP waveform; is the beat-to-beat SBP and DBP;  **Training hyperparameters**: Training epochs patience parameter for early stopping, training samples batch number ; |
| **Model:** UTransBPNet , fully connected layer; |
| **Phase 1——Train UTransBPNet** |
| 1 Initialize |
| 4 **While** **do** |
| 5 **For** **to** **do** |
| 7 **For** **to** **do** |
| 8 ; |
| 9 |
| 20 ; |
| 21 |
|  |
| 22 **End for** |
| 23 **End for** |
| 26 **End while** |
| **Phase 2——Train fully connected layer** |
| 27 *For DeepTune and FinalTune****,*** |
| Freeze |
|  |
| ; |
|  |
| *For AllTune:* |
| ; |
|  |
| ; |
|  |

**Supplementary Table.S2** The contribution of cross attention and different finetune schemes

| **Model Structure** | **Individual/General** | **Mean ± SD, mmHg** | | **MAD, mmHg** | | **PCC** | |
| --- | --- | --- | --- | --- | --- | --- | --- |
| **SBP** | **DBP** | **SBP** | **DBP** | **SBP** | **DBP** |
| ***Dataset_Drink*** | | | | | | | |
| UTransBPNet-DeepTune | Population | -0.56±9.27* | -0.21*±7.57* | 7.09* | 5.61* | 0.45±0.20 | 0.59±0.17 |
| UTransBPNet-FinalTune | Population | -0.83±11.04* | 0.10±7.32* | 8.39* | 5.48* | 0.60±0.19 | 0.63±0.16 |
| UTransBPNet-Crossattn-Det | Population | -1.93±10.80* | -0.45±7.42* | 7.96* | 5.71* | 0.56±0.27 | **0.67±0.20** |
| UTransBPNet-Crossattn-DeepTune | Population | -1.55±10.30* | -0.02±8.05* | 8.24* | 6.25* | 0.34±0.32 | 0.27±0.25 |
| UTransBPNet-Crossattn-FinalTune | Population | -0.92±9.13*† | **-0.19±6.28**† | 6.74*† | **4.69**† | **0.61±0.17** | 0.62±0.13 |
| UTransBPNet-Crossattn-AllTune | Population | **-0.74±8.72** | -0.23±6.31 | **6.59** | 4.99 | 0.59±0.19 | 0.60±0.17 |
| *Dataset_Exercise* | | | | | | | |
| UTransBPNet-DeepTune | Population | -1.61±15.21* | -2.06±10.88* | 11.69* | 8.68* | 0.67±0.13 | 0.54±0.19 |
| UTransBPNet-FinalTune | Population | -2.07±14.03* | -1.86±10.68* | 10.68* | 8.52* | 0.77±0.11 | 0.62±0.22 |
| UTransBPNet-Crossattn-Det | Population | -1.98±12.86* | -1.93±10.35* | 9.14* | 7.49* | 0.74±0.19 | 0.61±0.23 |
| UTransBPNet-Crossattn-DeepTune | Population | 0.08±16.34* | 0.36±10.13* | 12.91* | 7.94* | 0.57±0.19 | 0.33±0.34 |
| UTransBPNet-Crossattn-FinalTune | Population | -1.76±11.30*† | -0.85±8.65*† | **8.23**† | 6.42*† | 0.75±0.20 | 0.66±0.21 |
| UTransBPNet-Crossattn-AllTune | Population | **-0.18±10.52** | **-0.77±8.11** | 8.51 | **6.22** | **0.82±0.11** | **0.72±0.18** |
| *Dataset_MIMIC* | | | | | | | |
| UTransBPNet-DeepTune | Population | -0.14±13.47* | 0.26±5.63* | 10.26* | 4.23* | 0.46±0.17 | 0.42±0.11 |
| UTransBPNet-FinalTune | Population | 0.78±12.40* | 0.05±5.64* | 9.74* | 4.34* | 0.54±0.12 | 0.47±0.12 |
| UTransBPNet-Crossattn-Det | Population | -0.92±9.33* | 0.04±4.19* | 6.06* | 3.04* | 0.68±0.18 | 0.63±0.14 |
| UTransBPNet-Crossattn-DeepTune | Population | 0.94±17.66* | 0.66±8.86* | 14.05* | 7.05* | 0.35±0.33 | 0.31±0.26 |
| UTransBPNet-Crossattn-FinalTune | Population | 0.14±8.62*† | -0.34±4.11*† | 6.54*† | 3.22*† | 0.71±0.08 | 0.64±0.09 |
| UTransBPNet-Crossattn-AllTune | Population | 0.40±6.21 | **-0.11±3.10** | **4.38** | **2.25** | **0.78±0.07** | **0.69±0.09** |

(*) indicates that the SD or MAD of *UTransBPNet-Crossattn-AllTune* was significantly lower than other tested models. (†) indicates a significant contribution of cross attention in the performance gain. The bold values represent the best results among the models.


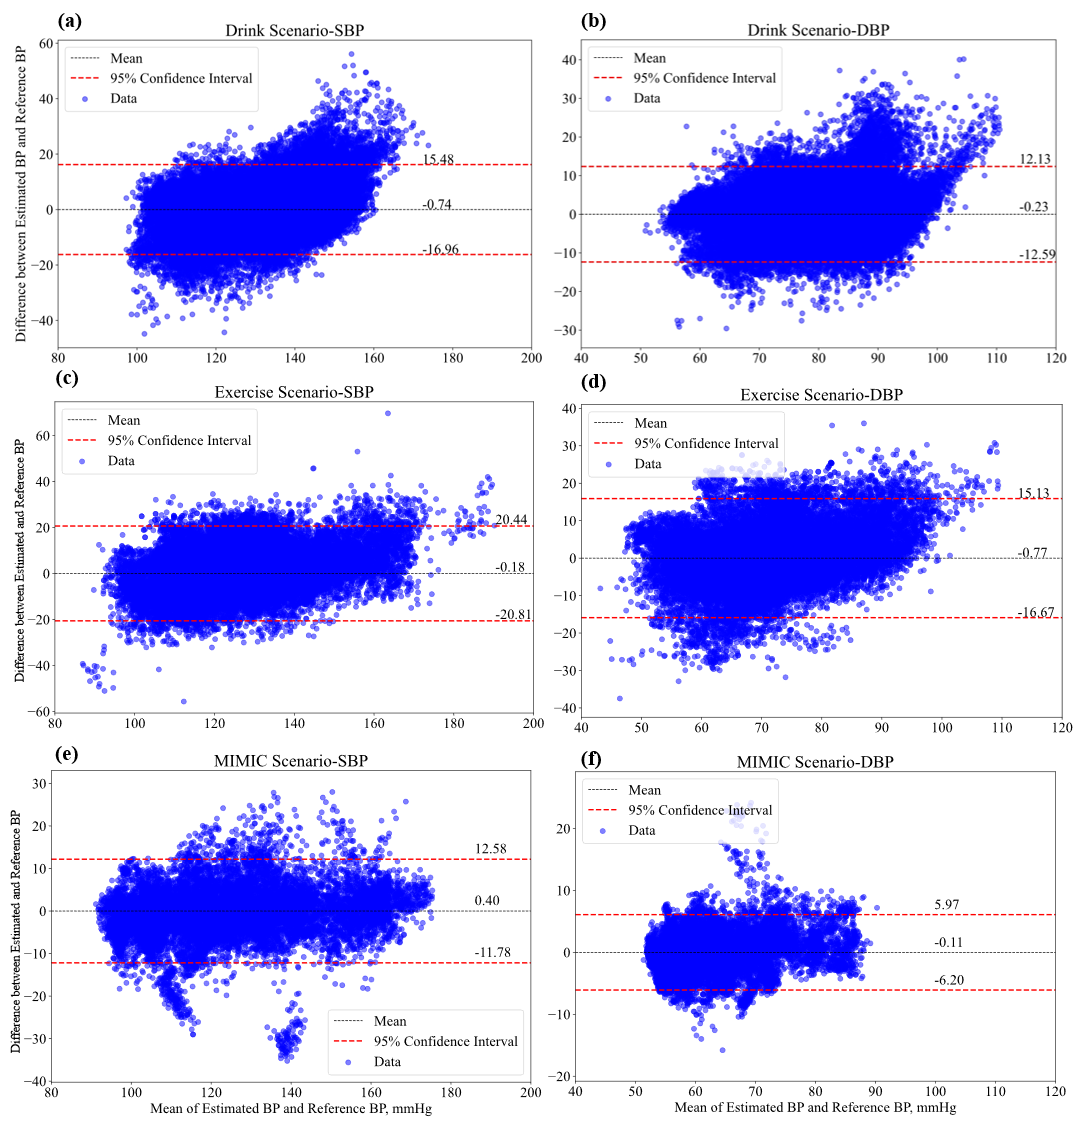


**Supplementary Fig.S1** The Bland-Altman plots of SBP and DBP predicted by *UTransBPNet_Crossattn_AllTune* under scenario-specific validation. (a-b) Drink scenario; (c-d) Exercise scenario; (e-f) MIMIC scenario.


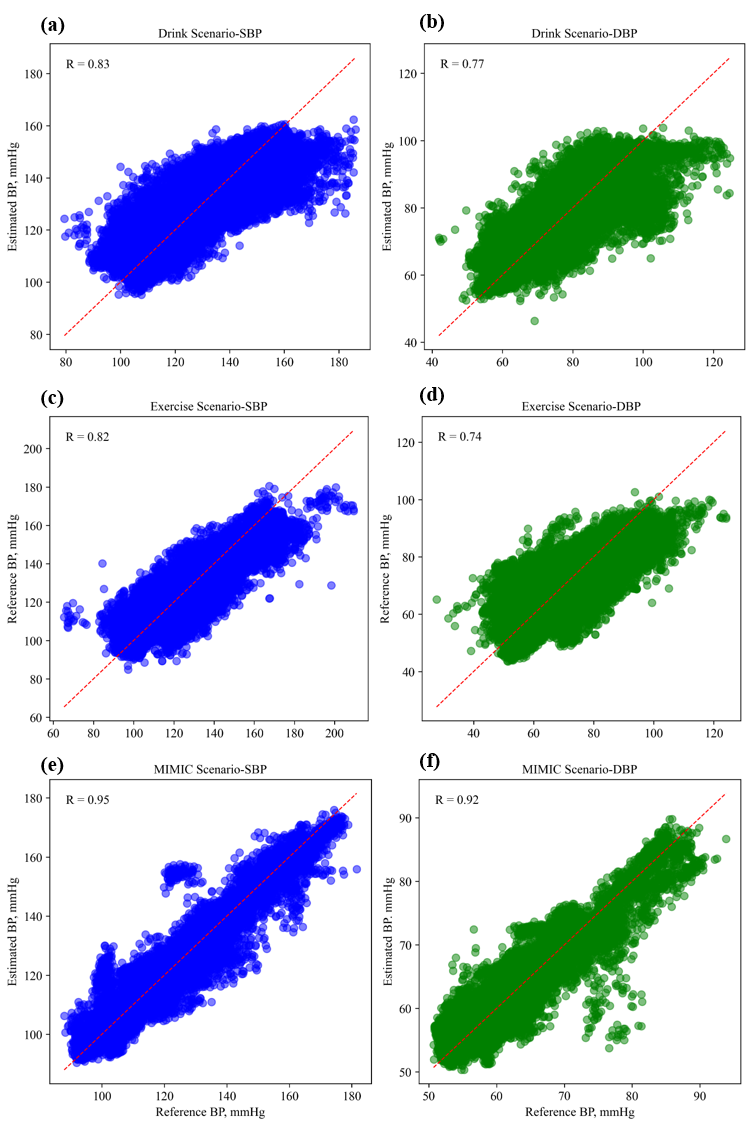


**Supplementary Fig.S2** The correlation plots of the reference and predicted SBP and DBP by *UTransBPNet_Crossattn_AllTune* under scenario-specific validation. (a-b) Drink scenario; (c-d) Exercise scenario; (e-f) MIMIC scenario.


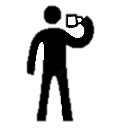

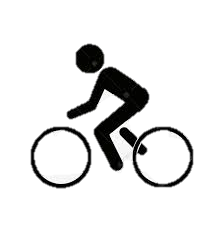


Drinking

Exercise

Predict

Predict


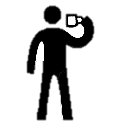

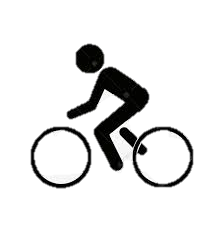


Drinking

Exercise

+


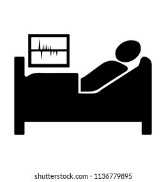


MIMIC

10% scenario-specific subjects for

finetuning

10% scenario-specific

instances for finetuning

**Time, beats**

**(a)**

**(b)**


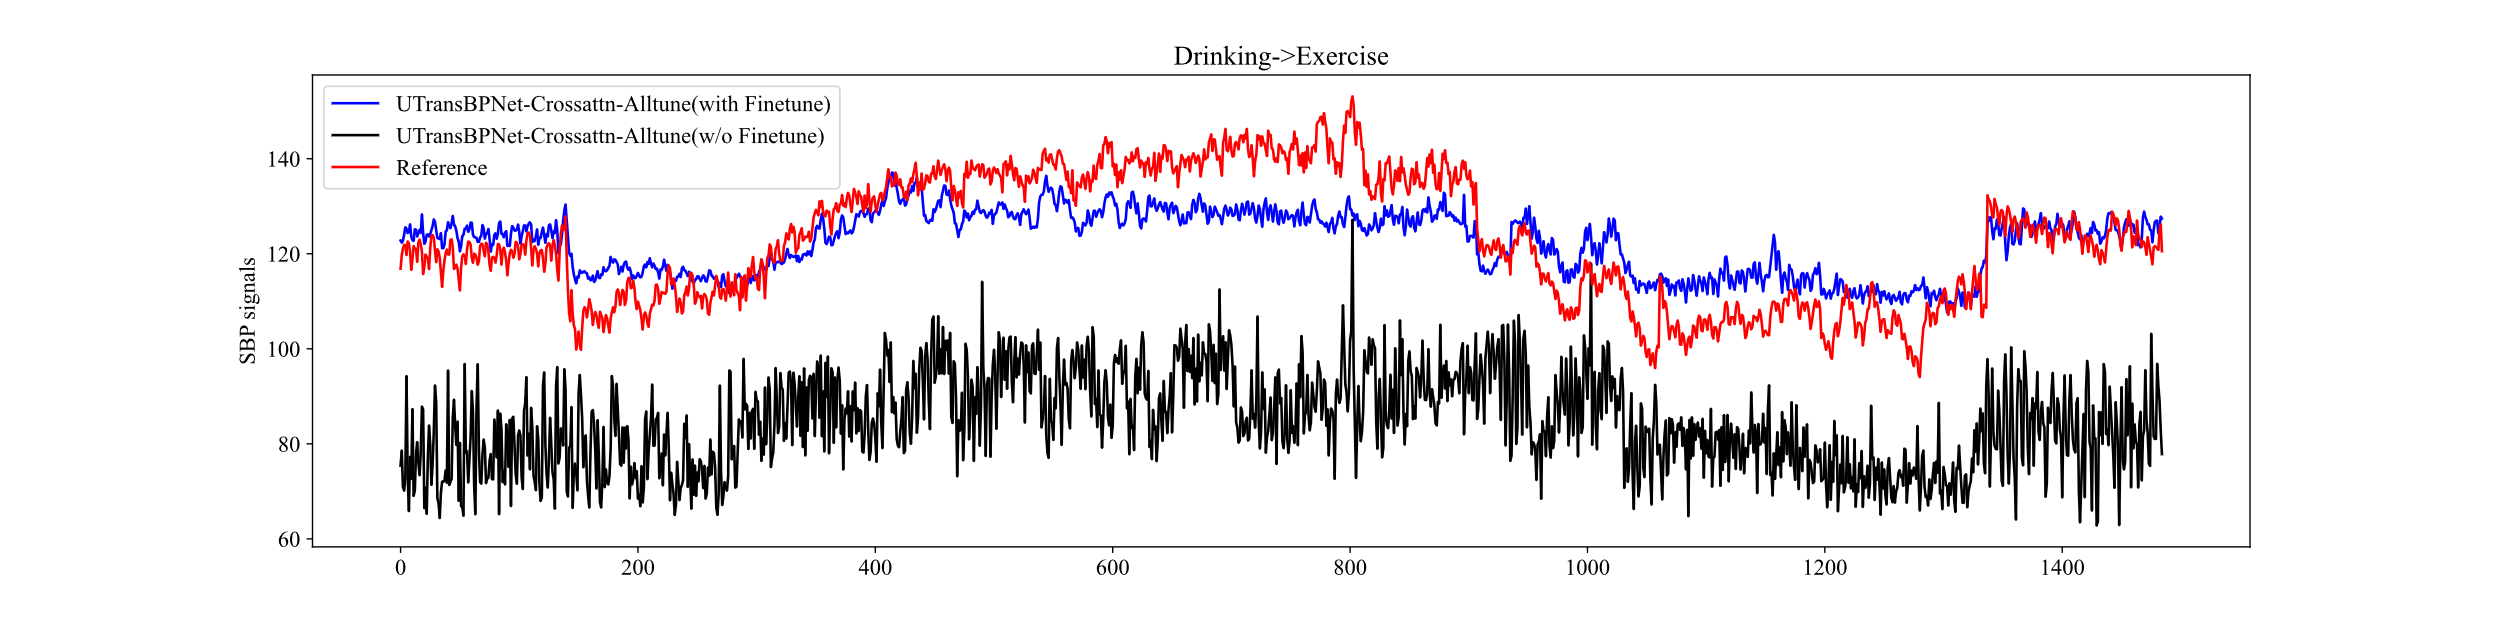

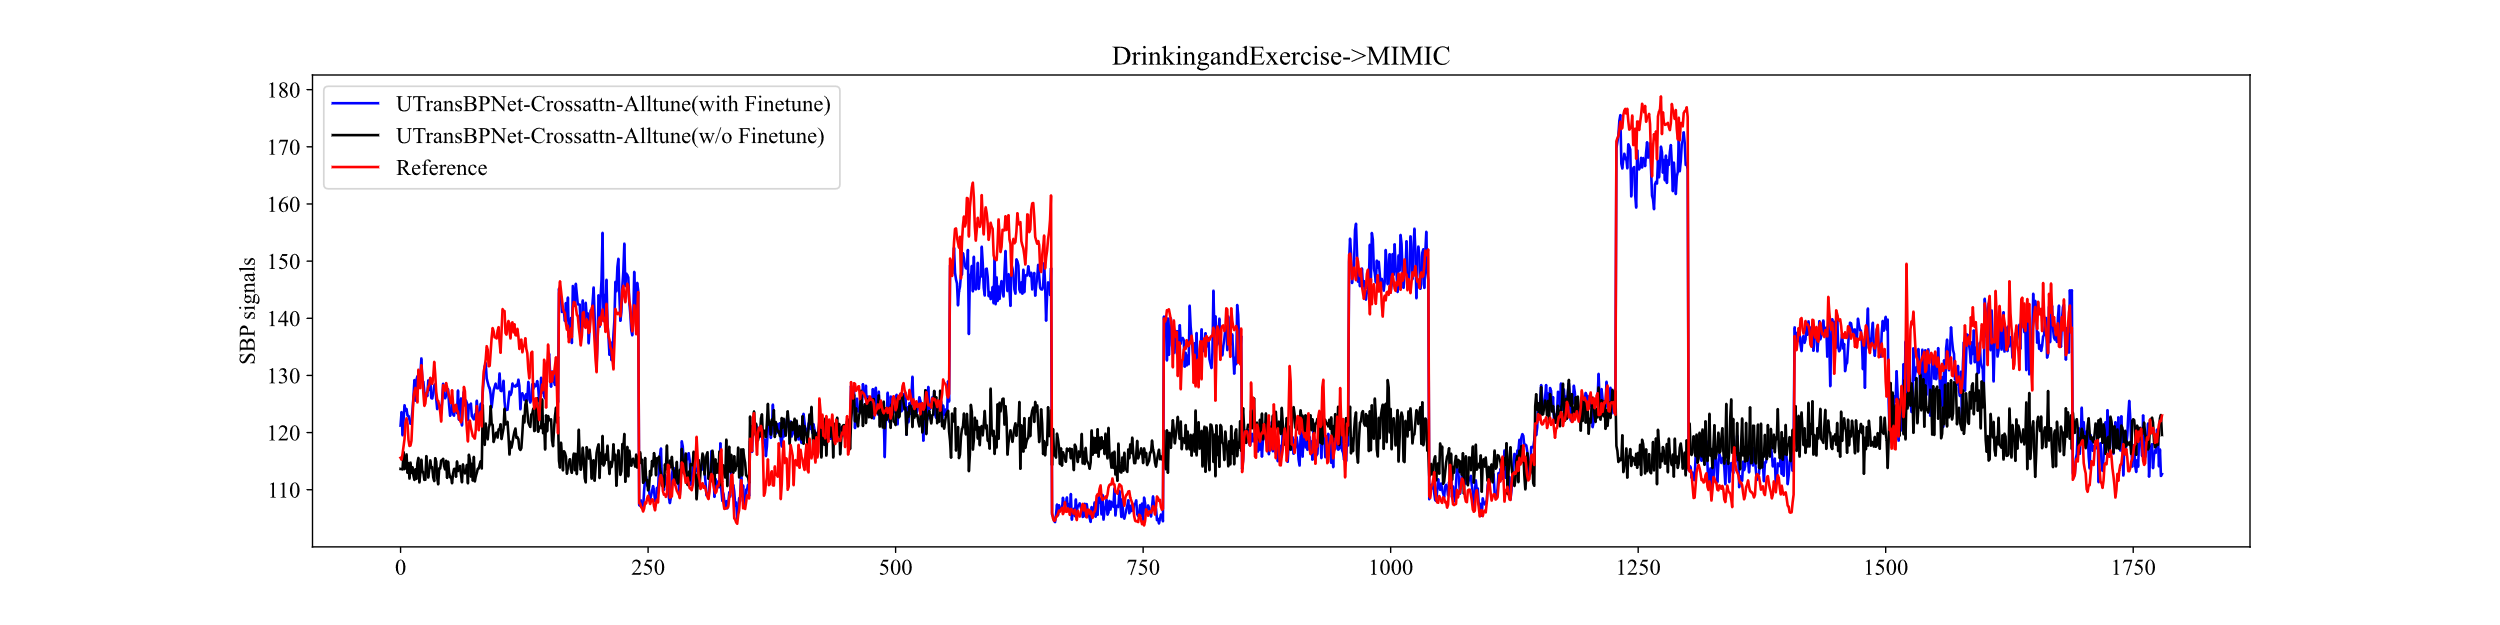


No. 1

2

3

4

5

6

7

8

9

10

11

12

13

14

15

16

17

18

19

**Supplementary Fig.S3** Representative results under cross-scenario settings. (a) Train with Dataset_Drink and test with Dataset_Exercise. The MADs of SBP of one subject from Dataset_Exercise are 13.33 and 3.59 mmHg for the model *w/o* and *with* scenario-specific finetuning, respectively. (b) Train with Dataset_Drink combining Dataset_Exercise and test with Dataset_MIMIC. The MADs of SBP of 19 instances from Dataset_MIMIC are 38.47 and 6.87 mmHg for the model w/o and with scenario-specific finetuning, respectively.
